# Supplementary material for: Pb intercalation underneath a graphene layer on Ru(0001) and its effect on graphene oxidation
Source: Royal Society of Chemistry journal article supplement (doi:10.1039/c1cp21843c), 2011-01-01

**Supporting information for:**

## **Pb intercalation underneath a graphene layer on Ru(0001) and its effect on graphene oxidation**

Li Jin, Qiang Fu\*, Rentao Mu, Dali Tan, Xinhe Bao\*

State Key Laboratory of Catalysis, Dalian Institute of Chemical Physics, the Chinese Academy of Sciences, Dalian 116023, P.R. China

**Figure S1.** An in-situ LEEM video acquired from a graphene/Ru(0001) surface subjected to Pb deposition at 180 °C (field of view = 50  $\mu\text{m}$ ; start voltage = 1.8 V). The whole time scale is 300s. The large island is graphene with sector shape. The video can be downloaded from the website:

<http://fruit.dicp.ac.cn/images/Jinli1-Figure S1 Pb intercalation.gif>.

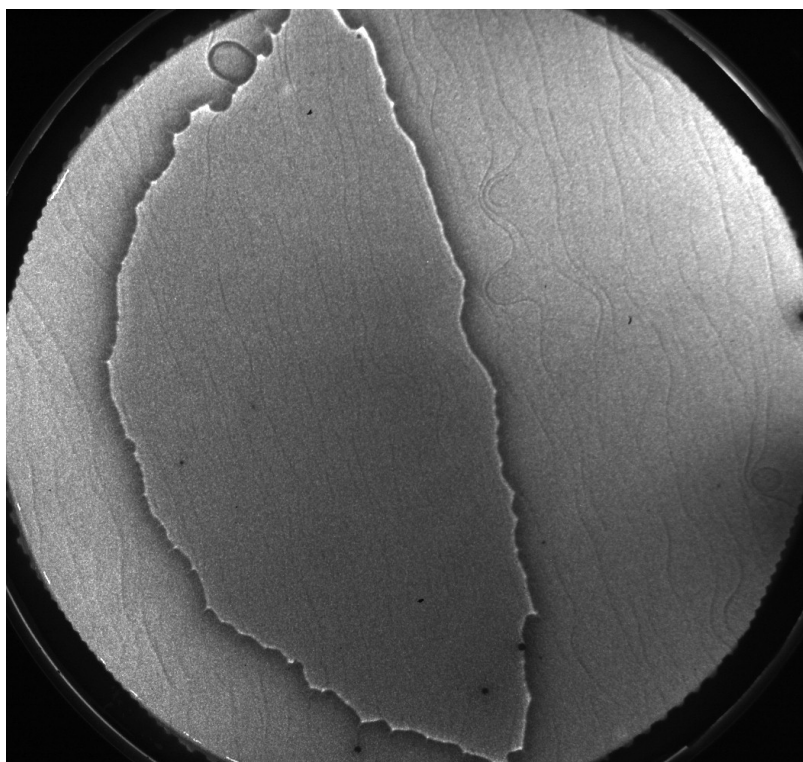

**Figure S2.** An in-situ LEEM video recorded from the Pb-intercalated graphene/Ru(0001) under  $5 \times 10^{-8}$  torr  $O_2$  and at 700 °C (field of view = 50  $\mu\text{m}$ ; start voltage = 4.1 V). The whole time scale is 240 s. The islands are intercalated graphene sheets with sector shape. The video can be downloaded from the website: <http://fruit.dicp.ac.cn/images/Jinli1-Figure S2 Pb-intercalated graphene O etching.gif>.

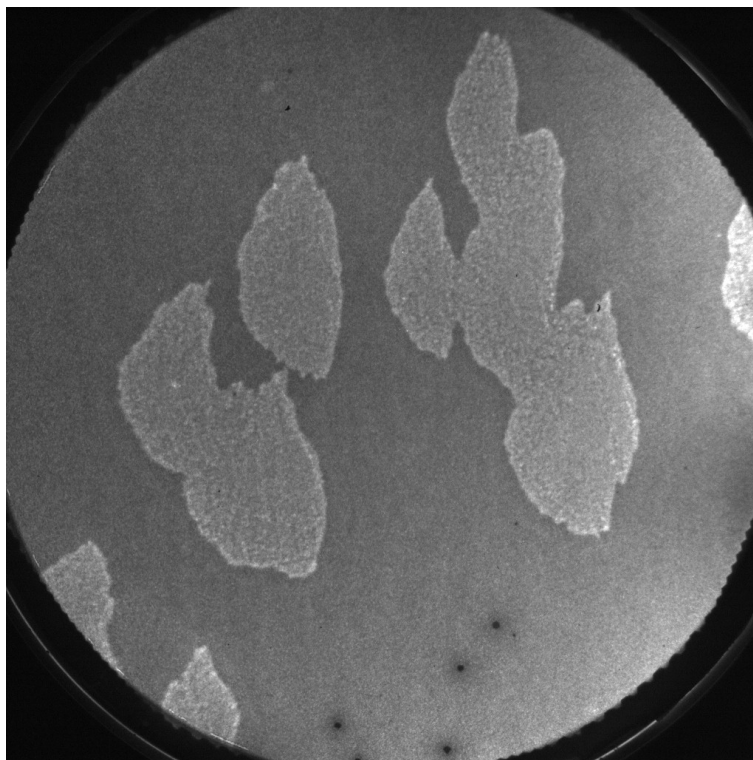

**Figure S3.** An in-situ LEEM video recorded from the graphene/Ru(0001) under  $5 \times 10^{-8}$  torr  $O_2$  and at 700 °C (field of view = 50  $\mu\text{m}$ ; start voltage = 9.8 V). The whole time scale is 97 s. The islands are monolayer graphene sheets with sector shape. The video can be downloaded from the website:

[http://fruit.dicp.ac.cn/images/Jinli1-Figure S3\\_graphene O etching.gif](http://fruit.dicp.ac.cn/images/Jinli1-Figure S3_graphene O etching.gif).

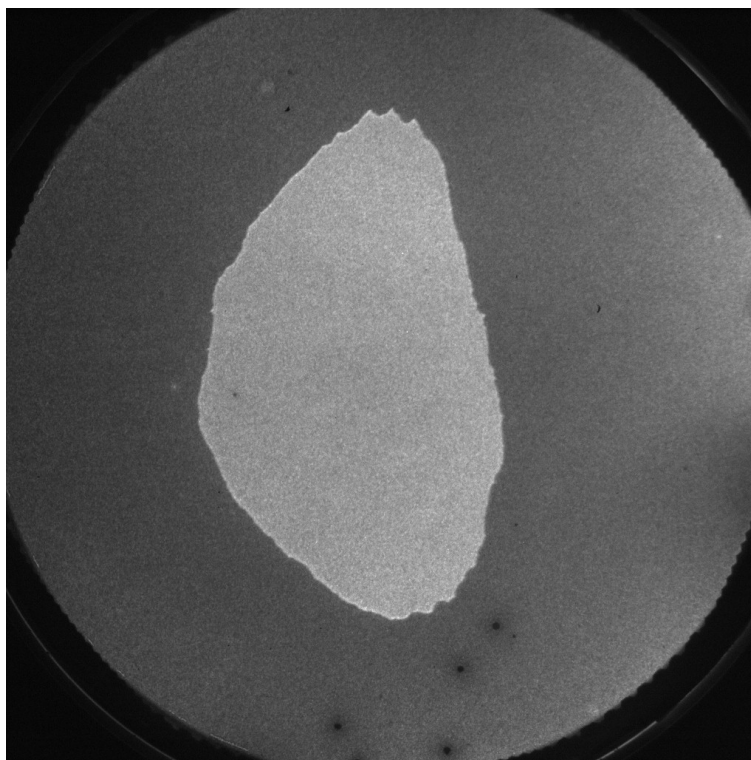

Supplement: c1cp21843c.pdf [file c1cp21843c.pdf]
